# Supplementary material
Source: PubMed Central journal article supplement (PMC4447102)
Supplement: NIHMS592303-supplement-supplemental_pdf.pdf [file NIHMS592303-supplement-supplemental_pdf.pdf]

**Cell, Volume 126**

**Supplemental Data**

**Tertiary Contacts Distant from  
the Active Site Prime a Ribozyme  
for Catalysis**

**Monika Martick and William G. Scott**

Additional materials are available at the authors' website:

<http://www.chemistry.ucsc.edu/~wgscott/hh>

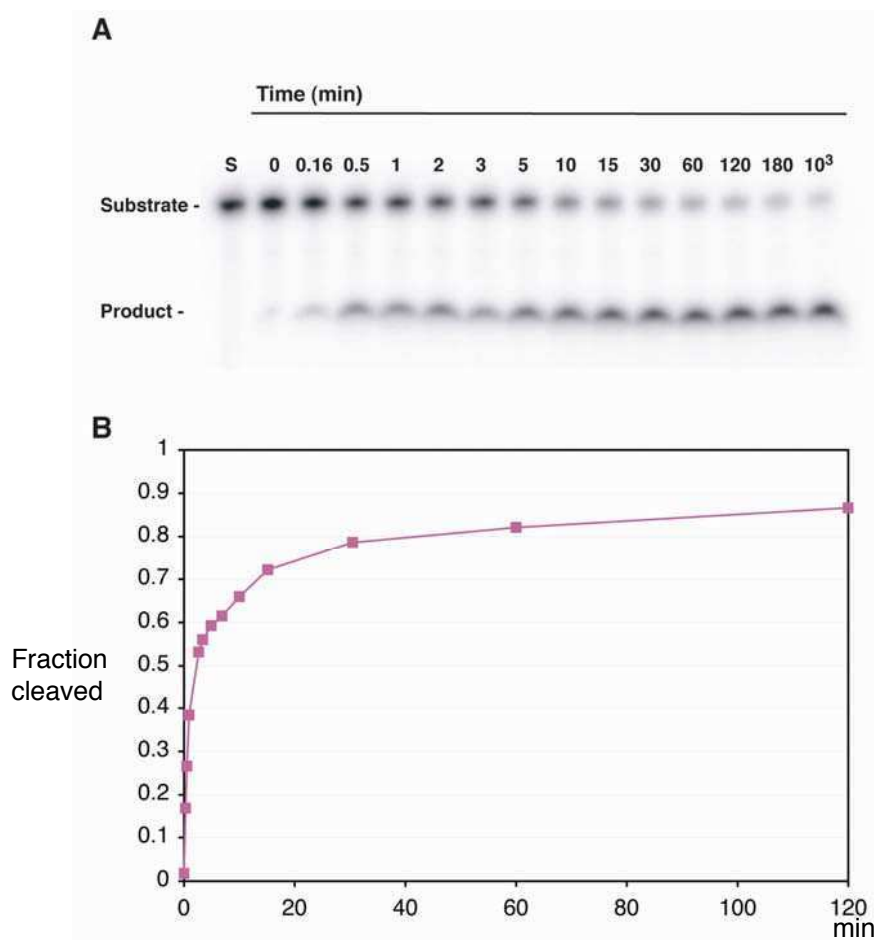

**Figure S1. Activity of the Full-Length Hammerhead Ribozyme Construct**

(A) 14% polyacrylamide gel electrophoretic assay of hammerhead ribozyme substrate cleavage as a function of time. The data shown are for the hammerhead RNA sequence used in the crystallographic experiments (Figure 1C in the main text). Capital S denotes substrate alone, and the zero time point was obtained before addition of magnesium.

(B) Plot of the fraction of substrate cleaved over time. The cleavage assays were performed under conditions similar to those published previously for the *Schistosoma* ribozyme (Canny et al., 2004). At pH 5.6 and in 10mM MgCl<sub>2</sub>, the construct used for crystallization cleaves at a rate of about 0.65 min<sup>-1</sup>, which is comparable to that of the wild type sequence (Canny et al., 2004, Supplementary Information). Furthermore, this construct cleaves to about 90 percent completion, or over 1.3 times more completely than what has been observed with the wild-type *Schistosoma* ribozyme sequence (Osborne et al., 2005, Canny et al., 2004).

The single turnover assay conditions were as follows: Cleavage assays were performed in the similar conditions as assayed previously (Canny et al., 2004), except that the all-ribose enzyme was >50 fold in excess of the all-ribose 5'-labeled substrate. The enzyme concentration was 16.5μM. The crystallographic construct assay conditions were 50mM MES pH5.6, 100mM NaCl, 0.1mM EDTA, 10mM MgCl<sub>2</sub>. Prior to adding MgCl<sub>2</sub> the enzyme and substrate (in the assay solution) were heated at 95° for 2 minutes, then 65° for 2 minutes, then allowed to equilibrate at 27° for 5 minutes. At this point a sample was taken out and designated as the zero time point. The reaction was initiated by adding the MgCl<sub>2</sub> and the subsequent time point samples were collected.

**Table S1. Br MAD Data Processing Statistics for Doubly Brominated Full-Length Hammerhead Ribozyme Crystals**Spacegroup: C2 Cell: a = 49.6Å b = 69.1Å c = 60.1Å  $\alpha = 90^\circ$   $\beta = 112^\circ$   $\gamma = 90^\circ$ 

| MAD Data Set:                         | Peak $\lambda$ : 0.919377 Å |              | Inflection $\lambda$ : 0.920070 Å |              | Remote $\lambda$ : 0.926608 Å |              |
|---------------------------------------|-----------------------------|--------------|-----------------------------------|--------------|-------------------------------|--------------|
|                                       | Overall                     | Outer Shell  | Overall                           | Outer Shell  | Overall                       | Outer Shell  |
| Low resolution limit (Å)              | 55.73                       | 2.32         | 55.81                             | 2.32         | 55.73                         | 2.32         |
| High resolution limit (Å)             | 2.20                        | 2.20         | 2.20                              | 2.20         | 2.20                          | 2.20         |
| $R_{merge}$                           | 0.041                       | 0.217        | 0.045                             | 0.241        | 0.048                         | 0.267        |
| $R_{meas}$ (within I+/I-)             | 0.055                       | 0.295        | 0.060                             | 0.325        | 0.065                         | 0.360        |
| $R_{meas}$ (all I+ & I-)              | 0.060                       | 0.293        | 0.061                             | 0.330        | 0.062                         | 0.355        |
| $R_{pim}$ (within I+/I-)              | 0.036                       | 0.197        | 0.040                             | 0.217        | 0.043                         | 0.240        |
| $R_{pim}$ (all I+ & I-)               | 0.029                       | 0.144        | 0.030                             | 0.162        | 0.030                         | 0.175        |
| Fractional partial bias               | -0.029                      | -0.123       | -0.031                            | -0.147       | -0.042                        | -0.165       |
| Total number of observations          | 38654                       | 5732         | 38974                             | 5742         | 38131                         | 5677         |
| Total number unique reflections       | 9625                        | 1410         | 9692                              | 1418         | 9611                          | 1415         |
| Mean(I)/ $\sigma$ (I)                 | 16.9                        | 4.9          | 16.6                              | 4.5          | 15.2                          | 4.0          |
| Completeness                          | 99.2                        | 100.0        | 99.3                              | 99.8         | 99.2                          | 99.7         |
| Multiplicity                          | 4.0                         | 4.1          | 4.0                               | 4.0          | 4.0                           | 4.0          |
| Anomalous completeness                | 98.4                        | 98.9         | 98.3                              | 97.9         | 97.9                          | 98.1         |
| Anomalous multiplicity                | 2.0                         | 2.1          | 2.1                               | 2.1          | 2.0                           | 2.0          |
| Data rejection cutoff                 | 0.0 $\sigma$                | 0.0 $\sigma$ | 0.0 $\sigma$                      | 0.0 $\sigma$ | 0.0 $\sigma$                  | 0.0 $\sigma$ |
| DelAnom correlation between half-sets | 0.193                       | -0.009       | 0.082                             | 0.024        | -0.135                        | -0.074       |
| Mid-Slope of Anom Normal Probability  | 1.186                       | na           | 1.105                             | na           | 0.934                         | na           |

**Table S2. MAD Phasing and Refinement Statistics**

|                                                |                          |                    |                                           |
|------------------------------------------------|--------------------------|--------------------|-------------------------------------------|
| <b>MAD Phasing:</b> CNS (max. likelihood)      |                          |                    |                                           |
| Resolution limits: 55 - 2.2 Å                  | <u>centrics</u>          | <u>acentrics</u>   | <u>all</u>                                |
| generalized Cullis R-value                     | N/A                      | 0.7655             | 0.7655                                    |
| Kraut R-value                                  | 0.0079                   | 0.0357             | 0.0349                                    |
| std of lack-of-closure                         | 5.5495                   | 5.5785             | 5.5748                                    |
| std of lack-of-isomorphism                     | 0.1133                   | 1.2237             | 1.1973                                    |
| Figure of Merit                                | 0.4197                   | 0.4029             | 0.4031                                    |
| Phasing Power                                  | 1.5020                   | 1.2586             | 1.2647                                    |
| <b>Refinement:</b> Refmac (max. likelihood)    |                          |                    |                                           |
| <b>Model error:</b>                            |                          |                    |                                           |
| Resolution limits (Å)                          | 55.7 - 2.2               |                    |                                           |
| Number of reflections (working set)            | 8688                     |                    |                                           |
| Number of RNA atoms (no hydrogens)             | 1347                     |                    |                                           |
| Number of water molecules                      | 72                       |                    |                                           |
| Number of Mg <sup>2+</sup>                     | 0                        |                    |                                           |
| Percentage observed                            | 99.08                    |                    |                                           |
| Percentage of free reflections                 | 9.716                    |                    |                                           |
| Overall R factor                               | 0.191                    |                    |                                           |
| Free R factor                                  | 0.241                    |                    |                                           |
| Overall correlation coefficient                | 0.957                    |                    |                                           |
| Free correlation coefficient                   | 0.935                    |                    |                                           |
| Coordinate error based on free R factor (Å)    | 0.222                    |                    |                                           |
| Overall figure of merit                        | 0.810                    |                    |                                           |
| Mean Temperature Factor (Å <sup>2</sup> )      | 45.49                    |                    |                                           |
| <b>Restraint type</b>                          | <b><u>restraints</u></b> | <b><u>rmsd</u></b> | <b><u>weight(<math>\sigma</math>)</u></b> |
| rmsd bond lengths (Å)                          | 1503                     | 0.009              | 0.021                                     |
| rmsd bond angles ( $^{\circ}$ )                | 2331                     | 1.676              | 3.000                                     |
| chiral centers (Å <sup>3</sup> )               | 312                      | 0.076              | 0.200                                     |
| rmsd planar angles (Å)                         | 649                      | 0.007              | 0.020                                     |
| van der Waals repulsions (Å)                   | 572                      | 0.165              | 0.200                                     |
| van der Waals torsions (Å)                     | 913                      | 0.277              | 0.200                                     |
| H-bond restraints (Å)                          | 100                      | 0.161              | 0.200                                     |
| crystal packing van der Waals (Å)              | 44                       | 0.127              | 0.200                                     |
| crystal packing H-bond restraints (Å)          | 9                        | 0.164              | 0.200                                     |
| $\sigma$ chain bond $\beta$ (Å <sup>2</sup> )  | 2111                     | 1.204              | 3.000                                     |
| $\sigma$ chain angle $\beta$ (Å <sup>2</sup> ) | 2331                     | 1.628              | 4.500                                     |

Data were processed using MOSFLM and CCP4. The crystal structure was phased to 2.2 Å resolution using Br peak and inflection point data within the crystallographic software suite CNS. Solvent flattening and simulated annealing molecular dynamics were also performed within CNS. Model building was performed in O. The final refinement was carried out using REFMAC and COOT.

Table S3. Sequential and Canonical Numbering Schemes for the Enzyme and Substrate Strands

| Substrate strand     |                     | Enzyme strand        |                     |
|----------------------|---------------------|----------------------|---------------------|
| Sequential numbering | Canonical numbering | Sequential numbering | Canonical numbering |
| 5'                   | 5'                  | 5'                   | 5'                  |
| G-1                  | G-16.5              | GDP-1                | GDP-2.10            |
| G-2                  | G-16.4              | G-2                  | G-2.9               |
| C-3                  | C-16.3              | A-3                  | A-2.8               |
| G-4                  | G-16.2              | U-4                  | U-2.7               |
| U-5                  | U-16.1              | G-5                  | G-B1.1              |
| C-6                  | C-17                | U-6                  | U-B1.2              |
| C-7                  | C-1.1               | A-7                  | A-B1.3              |
| U-8                  | U-1.2               | C-8                  | C-B1.4              |
| G-9                  | G-1.3               | U-9                  | U-2.6               |
| G-10                 | G-1.4               | A-10                 | U-2.5               |
| U-11                 | U-1.5               | C-11                 | C-2.4               |
| A-12                 | A-1.6               | C-12                 | C-2.3               |
| U-13                 | U-B1.5              | A-13                 | G-2.2               |
| C-14                 | C-B1.6              | G-14                 | G-2.1               |
| C-15                 | C-B1.7              | C-15                 | C-3                 |
| A-16                 | A-B1.8              | U-16                 | U-4                 |
| A-17                 | A-1.7               | G-17                 | G-5                 |
| U-18                 | U-1.8               | A-18                 | A-6                 |
| C-19                 | C-1.9               | U-19                 | U-7                 |
| dC-20                | dC-1.10             | G-20                 | G-8                 |
| 3'                   | 3'                  | A-21                 | A-9                 |
|                      |                     | G-22                 | G-10.1              |
|                      |                     | U-23                 | U-10.2              |
|                      |                     | C-24                 | C-10.3              |
|                      |                     | C-25                 | C-10.4              |
|                      |                     | C-26                 | C-L2.1              |
|                      |                     | A-27                 | A-L2.2              |
|                      |                     | A-28                 | A-L2.3              |
|                      |                     | A-29                 | A-L2.4              |
|                      |                     | U-30                 | U-L2.5              |
|                      |                     | A-31                 | A-L2.6              |
|                      |                     | G-32                 | G-11.4              |
|                      |                     | G-33                 | G-11.3              |
|                      |                     | A-34                 | A-11.2              |
|                      |                     | C-35                 | C-11.1              |
|                      |                     | G-36                 | G-12                |
|                      |                     | A-37                 | A-13                |
|                      |                     | A-38                 | A-14                |
|                      |                     | A-39                 | A-15.1              |
|                      |                     | C-40                 | C-15.2              |
|                      |                     | G-41                 | G-15.3              |
|                      |                     | C-42                 | C-15.4              |
|                      |                     | C-43                 | C-15.5              |
|                      |                     | 3'                   | 3'                  |

  

The sequential and canonical numbering schemes for the enzyme and substrate strands are provided for convenient translation.
